# Supplementary material
Source: Springer Nature journal article supplement (https://www.springermedizin.de/resource/supplementary/13229_2012_55_MOESM3_ESM.pdf/9676070)
Supplement: MOESM3 [file 9676070]

**Supplementary Table 2. Heritability estimates and their standard errors (se) obtained when contrasting AGP and SSC samples of the same relationship type, as well as contrasting HealthABC versus NGRC controls.**

|                       | <b>SSC versus All AGP</b> |           | <b>SSC versus Simplex AGP</b> |           |
|-----------------------|---------------------------|-----------|-------------------------------|-----------|
|                       | <b>estimate</b>           | <b>se</b> | <b>estimate</b>               | <b>se</b> |
| Probands              | 0.084                     | 0.092     | 0.000                         | 0.139     |
| Mothers               | 0.109                     | 0.091     | 0.063                         | 0.140     |
| Fathers               | 0.188                     | 0.089     | 0.126                         | 0.129     |
| Pseudo Controls       | 0.215                     | 0.090     | 0.176                         | 0.132     |
| <b>Controls</b>       |                           |           |                               |           |
|                       | <b>estimate</b>           |           | <b>se</b>                     |           |
| HealthABC versus NGRC | 0.265                     |           | 0.071                         |           |
